# Supplementary material for: Motor axonopathies in a mouse model of Duchenne muscular dystrophy
Source: PubMed Central journal article supplement (PMC7265344; doi:10.1038/s41598-020-65824-1), 2020-06-02

# **Motor axonopathies in a mouse model of Duchenne muscular dystrophy**

Justin S. Dhindsa<sup>1</sup>, Angela L. McCall<sup>1</sup>, Laura M. Strickland<sup>1</sup>, Anna F. Fusco<sup>1</sup>, Amanda F. Kahn<sup>1</sup>, Mai K. Elmallah<sup>1\*</sup>

<sup>1</sup>Division of Allergy, Immunology, and Pulmonary Medicine, Department of Pediatrics, Duke University Medical Center Box 2644, Durham, North Carolina 27710, USA

\*Correspondence: [mai.elmallah@duke.edu](mailto:mai.elmallah@duke.edu)

## **Supplementary Figures**

## Supplemental Figure Titles and Legends

### Figure S1 Small-caliber axons are not demyelinated in *mdx* mice

**a**, Myelin sheath thickness of small-caliber axons ( $< 5 \mu\text{m}$ ) in wildtype mice (phrenic:  $1.94 \mu\text{m} \pm 0.06$ ,  $n = 45$  axons; XII:  $1.86 \mu\text{m} \pm 0.02$ ,  $n = 124$  axons) and *mdx* mice (phrenic:  $2.00 \mu\text{m} \pm 0.02$ ,  $n = 105$  axons; XII:  $1.82 \mu\text{m} \pm 0.01$ ,  $n = 229$  axons). Phrenic:  $p = 0.234$  Two Sample *t*-test; XII:  $p = 0.170$  Two Sample *t*-test.

### Figure S2 Phrenic and XII motor neuron counts

**a**, Bright field images of C4 spinal cord sections. Dashed circle around the phrenic motor pool. **b**, Bright field images of medulla sections. Scale bars represent  $100 \mu\text{m}$ . **c**, Average phrenic motor neurons per cervical spinal cord section (Wildtype:  $11.87$  motor neurons  $\pm 0.58$ ,  $n = 2$  mice; *mdx*:  $14.51$  motor neurons  $\pm 1.71$ ,  $n = 3$  mice). **d**, Average XII motor neurons per medulla section (Wildtype:  $136.01$  motor neurons  $\pm 11.20$ ,  $n = 3$  mice ; *mdx*:  $117.10$  motor neurons  $\pm 5.08$ ,  $n = 3$  mice). Phrenic:  $p = 0.261$  Two Sample *t*-test; XII:  $p = 0.229$  Two Sample *t*-test.

**a****Phrenic**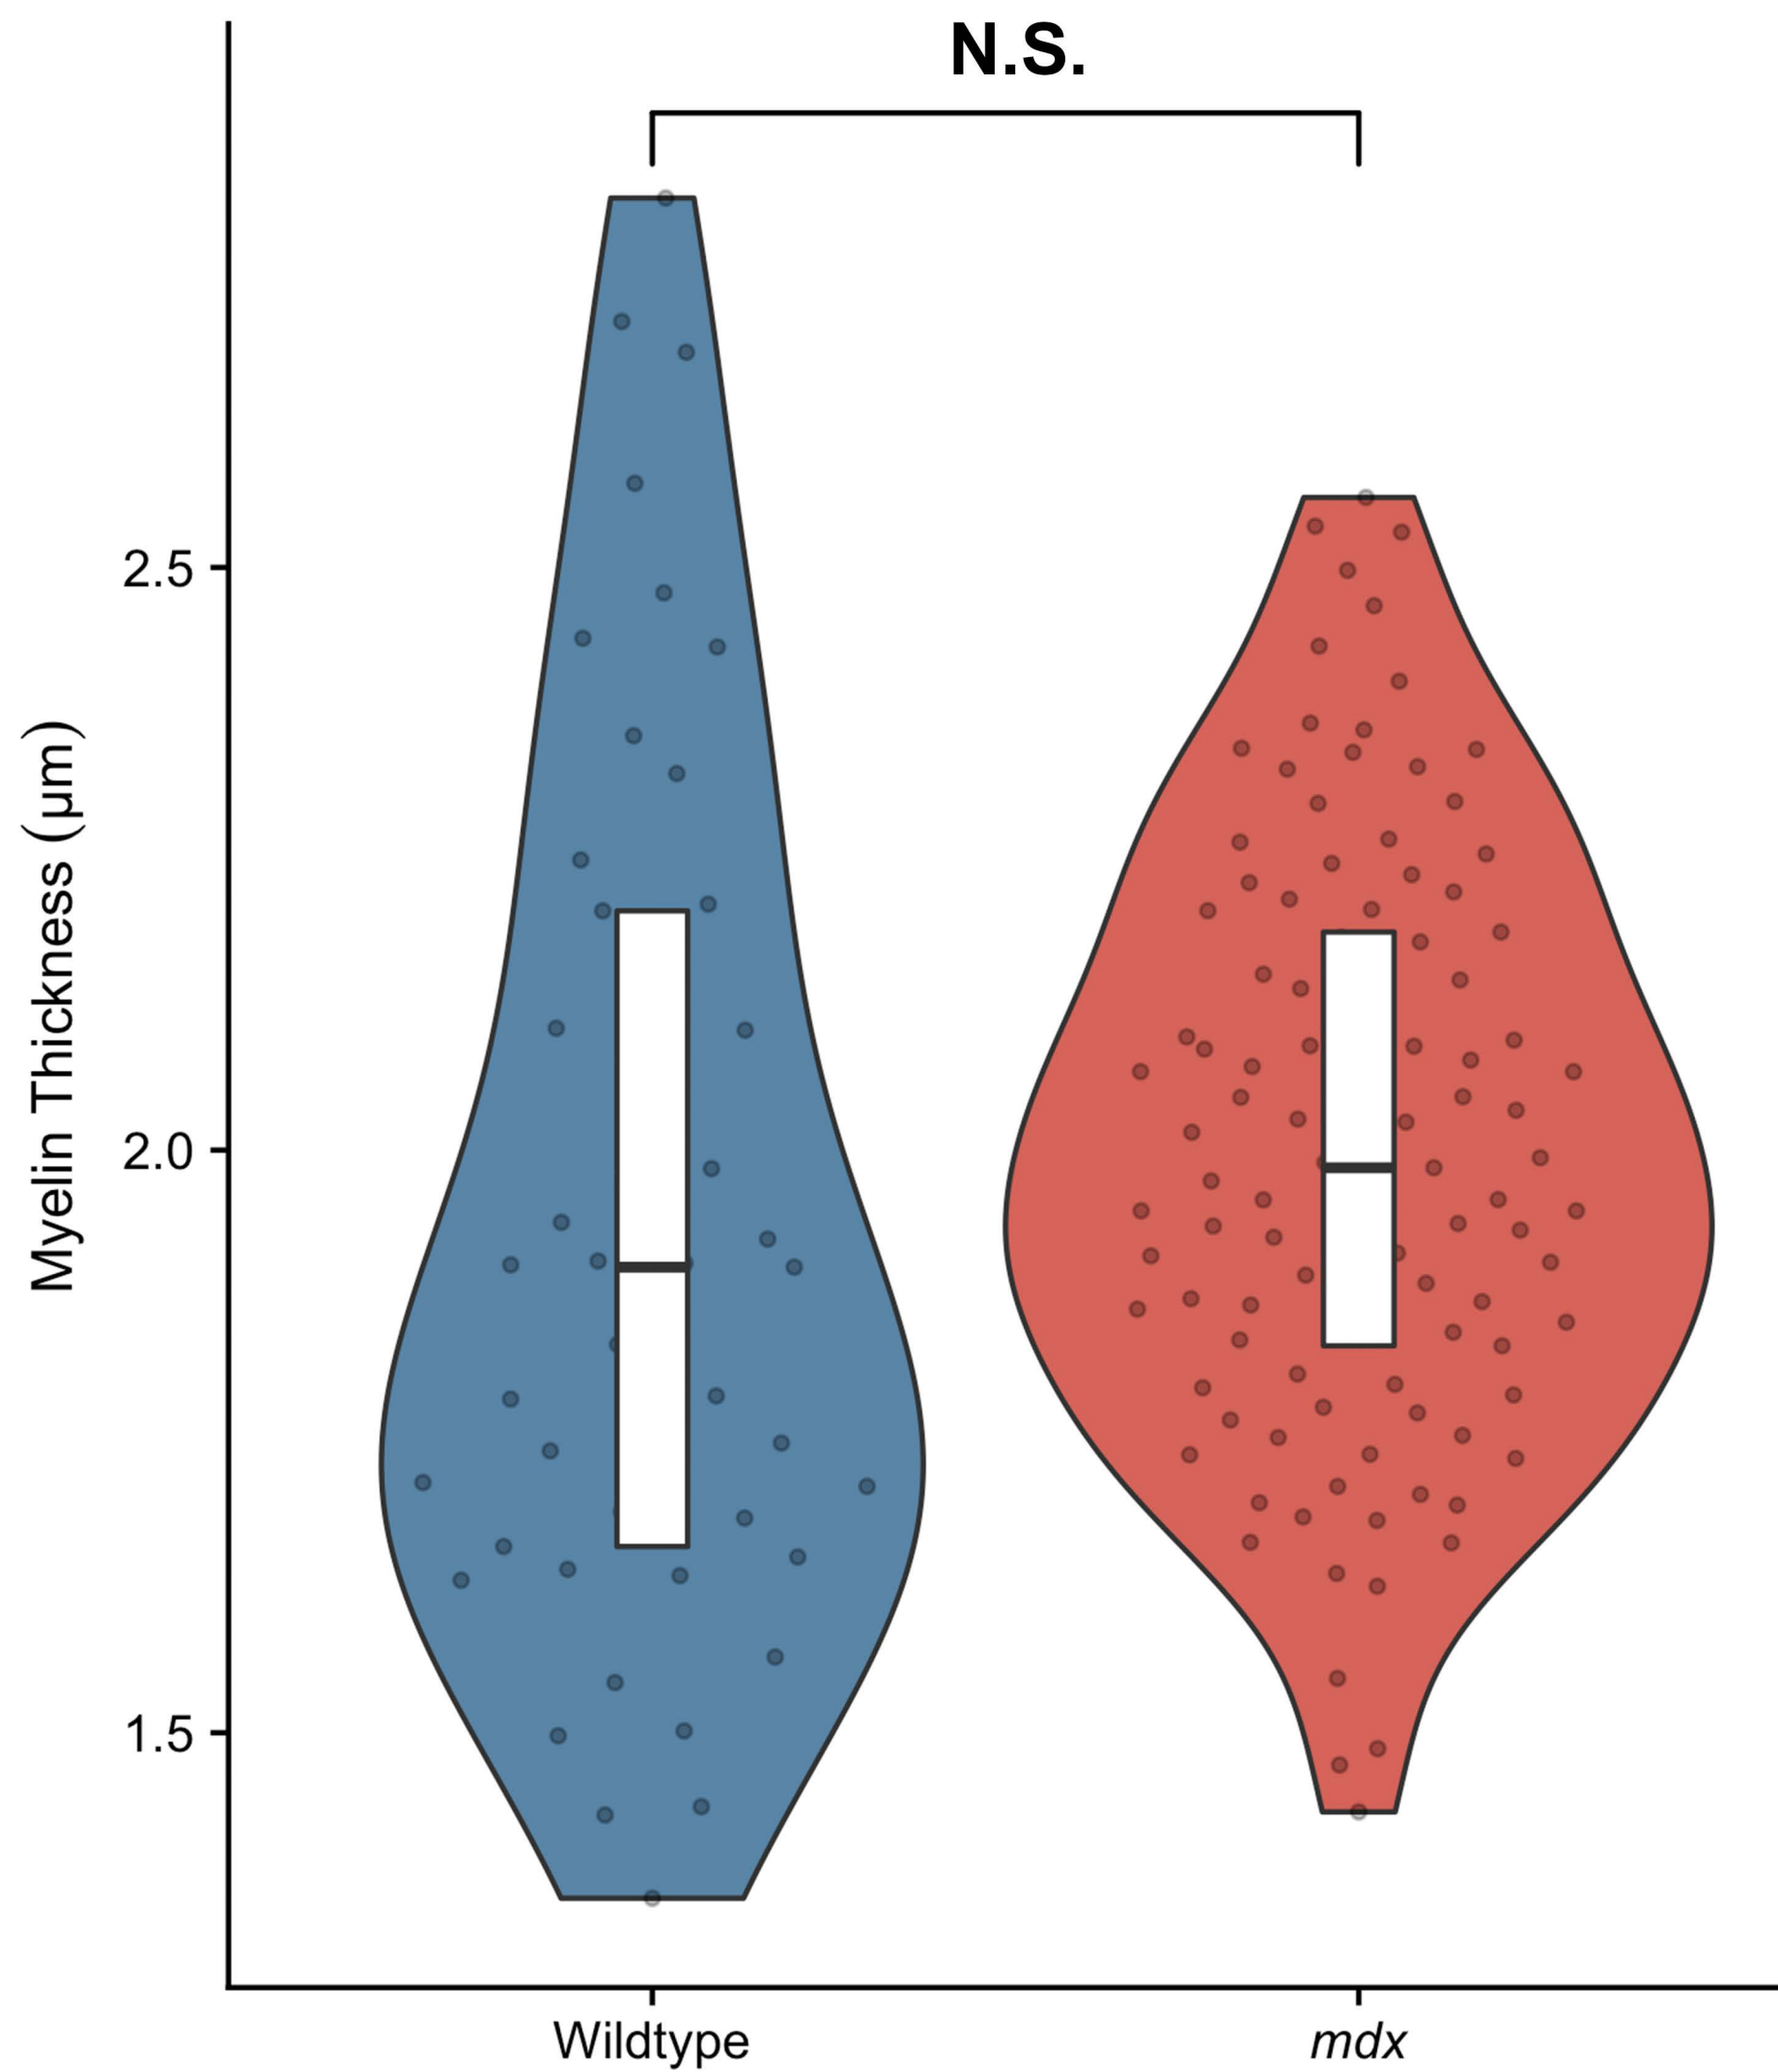**XII**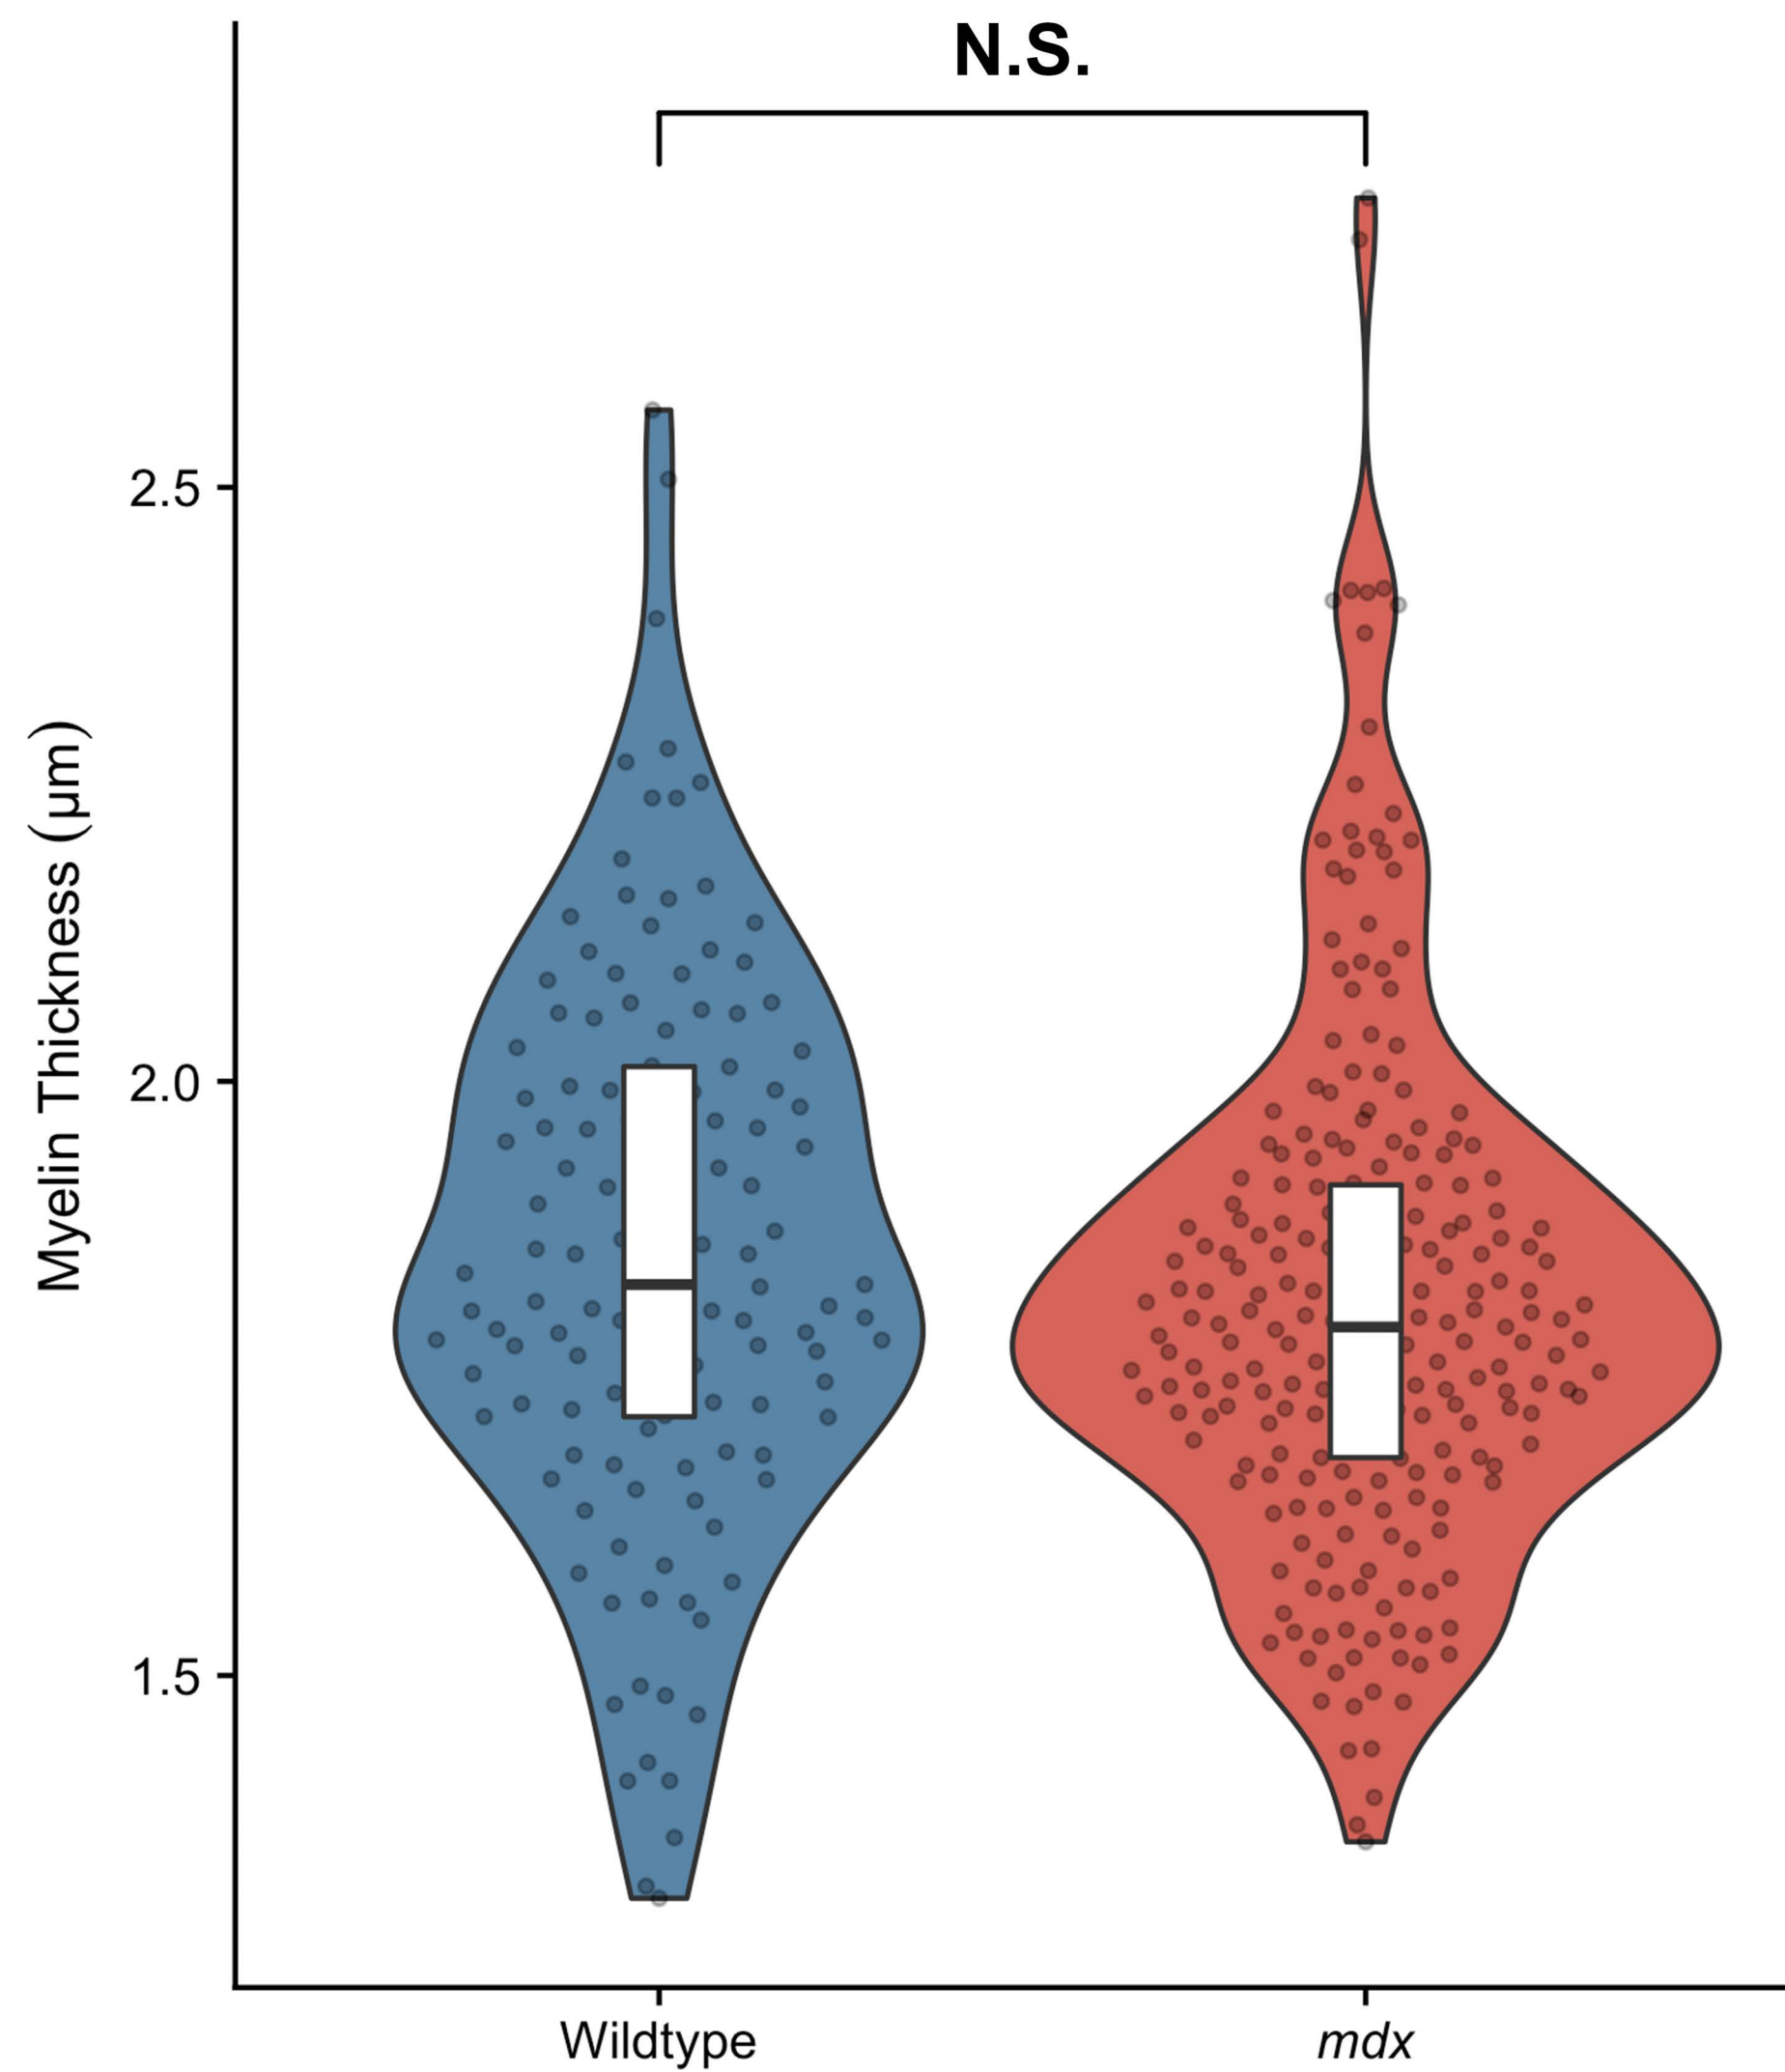

**a****Cervical WT**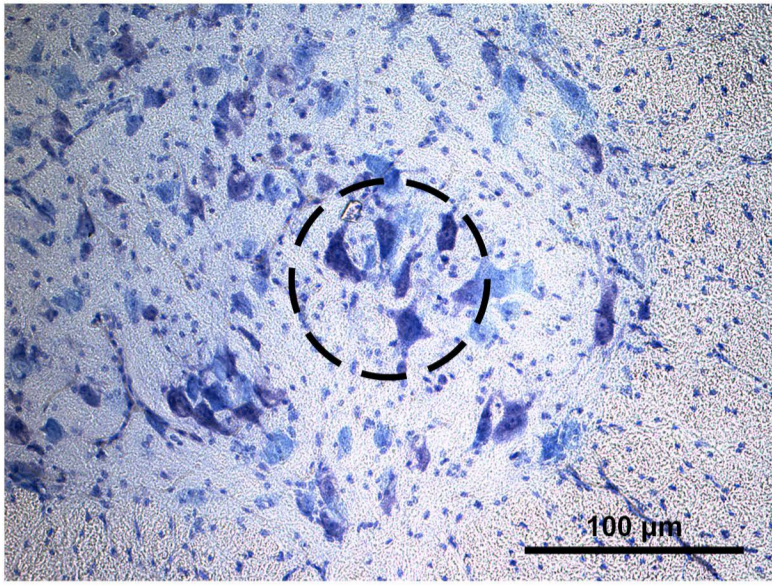**Cervical *mdx***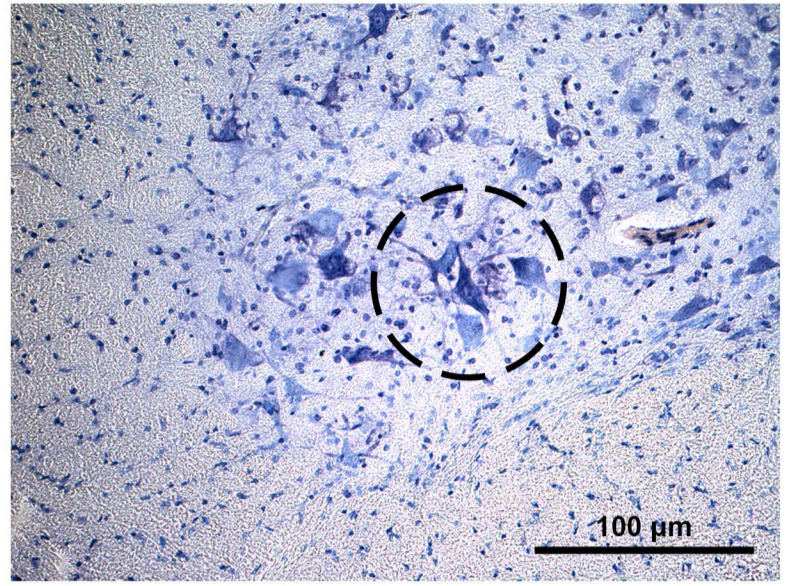**b****Medulla WT**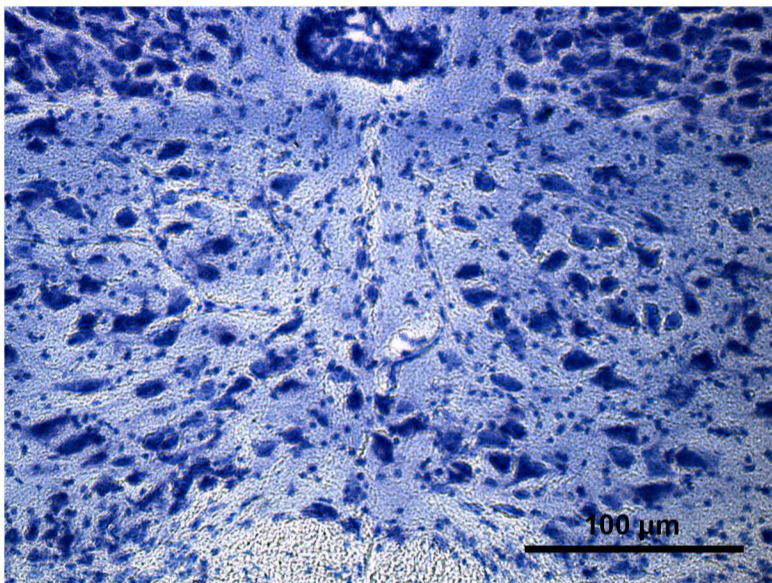**Medulla *mdx***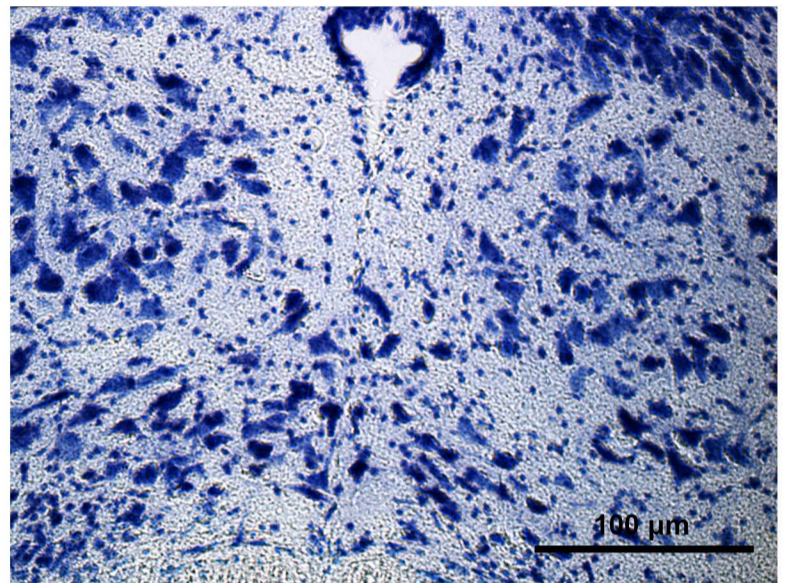**c****Phrenic****N.S.**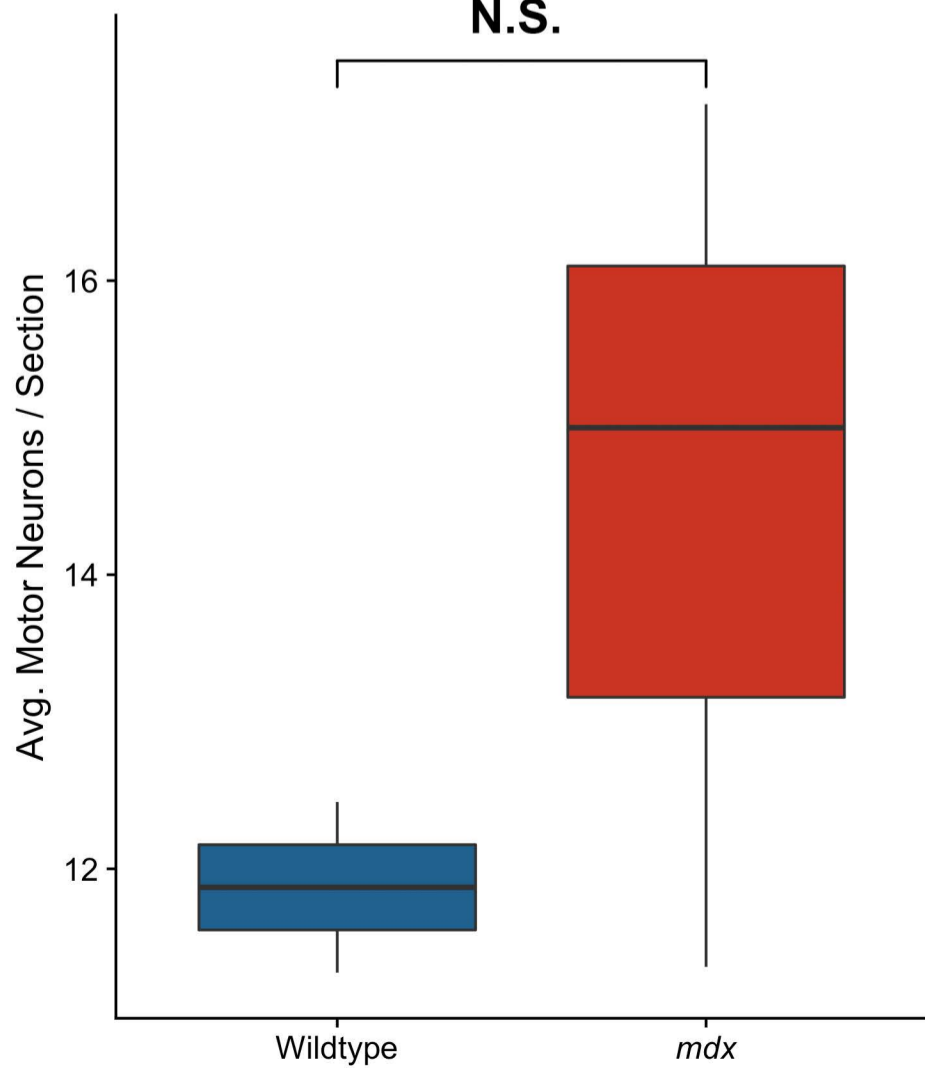**d****XII****N.S.**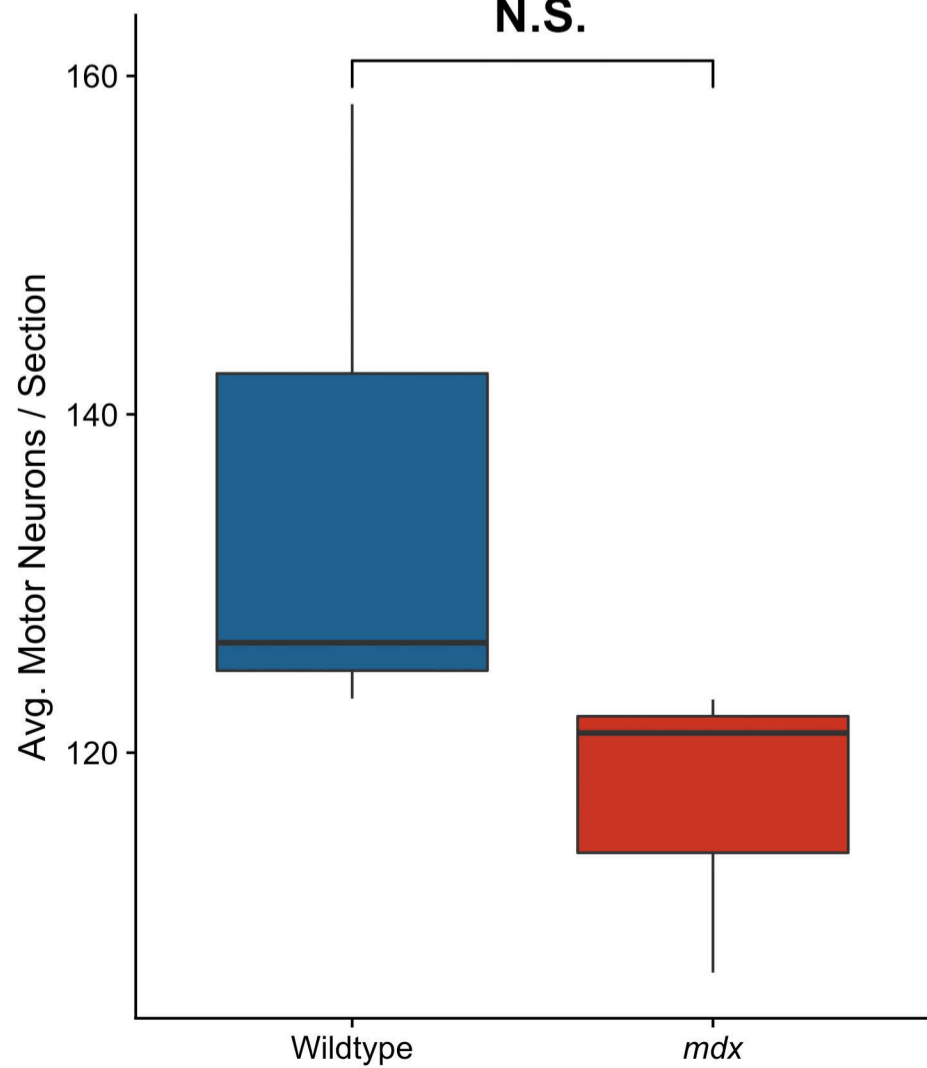

Supplement: 41598_2020_65824_MOESM1_ESM.pdf [file 41598_2020_65824_MOESM1_ESM.pdf]
